# Supplementary material
Source: HighWire-hosted journal article supplement (doi:10.1136/ebmental-2012-101098)
Supplement: ebmental-2012-101098supp.pdf [file ebmental-2012-101098supp.pdf]

## References

- 1 Mondraty N, Birmingham CL, Touyz S et al. Randomized controlled trial of olanzapine in the treatment of cognitions in anorexia nervosa. *Australas Psychiatry* 2005;13:72-5.
- 2 Sysko R, Walsh BT, Schebendach J, et al. Eating behaviour among women with anorexia nervosa. *Am J Clin Nutr* 2005;82:296-301.
- 3 Bisada H, Tasca GA, Barber AM, et al. Olanzapine in the treatment of low body weight and obsessive thinking in women with anorexia nervosa: a randomized, double-blind, placebo-controlled trial. *Am J Psychiatry* 2008;165:1281-1288
4. Lock J, Le Grange D, Agras W et al. Randomized clinical trial comparing family-based treatment with adolescent-focused individual therapy for adolescents with anorexia nervosa. *Arch Gen Psychiatry* 2010;67:1025-32.
